# Supplementary material for: Pathway-Based Drug Repositioning for Breast Cancer Molecular Subtypes
Source: Front Pharmacol. 2018 Aug 15;9:905. doi: 10.3389/fphar.2018.00905 (PMC6104565; doi:10.3389/fphar.2018.00905)
Supplement: Supplementary file 3 [file Data_Sheet_3.ZIP › BasalMetpaw_nohsa01100_antihomeostasis.tsv]

Drug	Gene	PDS	logFC	Interaction	Pathway
CLADRIBINE	PNP	2.47568071544642	1.62852682282495	inducer	hsa00230 Purine metabolism
TOFISOPAM	PDE2A	2.47568071544642	-3.96290369850556	inhibitor	hsa00230 Purine metabolism
KETOTIFEN	PDE8B	2.47568071544642	-2.50981161600359	inhibitor	hsa00230 Purine metabolism
CLADRIBINE	PNP	2.42227381177835	1.62852682282495	inducer	hsa00240 Pyrimidine metabolism
PHENYLBUTAZONE	PTGIS	2.31443533692712	-1.70891220522319	inhibitor	hsa00590 Arachidonic acid metabolism
DISULFIRAM	ALDH2	2.30551508270605	-2.36388524499781	inhibitor	hsa00310 Lysine degradation
DISULFIRAM	ALDH2	2.30551508270605	-2.36388524499781	inhibitor	hsa00310 Lysine degradation
DISULFIRAM	ALDH2	2.30390051020576	-2.36388524499781	inhibitor	hsa00340 Histidine metabolism
DISULFIRAM	ALDH2	2.30390051020576	-2.36388524499781	inhibitor	hsa00340 Histidine metabolism
AMODIAQUINE	HNMT	2.30390051020576	-1.76254579666267	inhibitor	hsa00340 Histidine metabolism
PHENTERMINE	MAOA	2.30390051020576	-4.66107961090304	antagonist	hsa00340 Histidine metabolism
TRANYLCYPROMINE	MAOA	2.30390051020576	-4.66107961090304	inhibitor	hsa00340 Histidine metabolism
PHENELZINE	MAOA	2.30390051020576	-4.66107961090304	antagonist	hsa00340 Histidine metabolism
MINAPRINE	MAOA	2.30390051020576	-4.66107961090304	inhibitor	hsa00340 Histidine metabolism
ZONISAMIDE	MAOA	2.30390051020576	-4.66107961090304	inhibitor	hsa00340 Histidine metabolism
SELEGILINE	MAOA	2.30390051020576	-4.66107961090304	inhibitor	hsa00340 Histidine metabolism
MOCLOBEMIDE	MAOA	2.30390051020576	-4.66107961090304	inhibitor	hsa00340 Histidine metabolism
ISOCARBOXAZID	MAOA	2.30390051020576	-4.66107961090304	inhibitor	hsa00340 Histidine metabolism
MMDA	MAOA	2.30390051020576	-4.66107961090304	inhibitor	hsa00340 Histidine metabolism
4-METHOXYAMPHETAMINE	MAOA	2.30390051020576	-4.66107961090304	inhibitor	hsa00340 Histidine metabolism
METHAMPHETAMINE	MAOA	2.30390051020576	-4.66107961090304	inhibitor	hsa00340 Histidine metabolism
PARGYLINE	MAOA	2.30390051020576	-4.66107961090304	inhibitor	hsa00340 Histidine metabolism
ZIMELIDINE	MAOA	2.30390051020576	-4.66107961090304	inhibitor	hsa00340 Histidine metabolism
ISOVANILLIN	AOX1	2.29936850207029	-3.12265763755552	inhibitor	hsa00982 Drug metabolism - cytochrome P450
MENADIONE	AOX1	2.29936850207029	-3.12265763755552	inhibitor	hsa00982 Drug metabolism - cytochrome P450
PHENTERMINE	MAOA	2.29936850207029	-4.66107961090304	antagonist	hsa00982 Drug metabolism - cytochrome P450
TRANYLCYPROMINE	MAOA	2.29936850207029	-4.66107961090304	inhibitor	hsa00982 Drug metabolism - cytochrome P450
PHENELZINE	MAOA	2.29936850207029	-4.66107961090304	antagonist	hsa00982 Drug metabolism - cytochrome P450
MINAPRINE	MAOA	2.29936850207029	-4.66107961090304	inhibitor	hsa00982 Drug metabolism - cytochrome P450
ZONISAMIDE	MAOA	2.29936850207029	-4.66107961090304	inhibitor	hsa00982 Drug metabolism - cytochrome P450
SELEGILINE	MAOA	2.29936850207029	-4.66107961090304	inhibitor	hsa00982 Drug metabolism - cytochrome P450
MOCLOBEMIDE	MAOA	2.29936850207029	-4.66107961090304	inhibitor	hsa00982 Drug metabolism - cytochrome P450
ISOCARBOXAZID	MAOA	2.29936850207029	-4.66107961090304	inhibitor	hsa00982 Drug metabolism - cytochrome P450
MMDA	MAOA	2.29936850207029	-4.66107961090304	inhibitor	hsa00982 Drug metabolism - cytochrome P450
4-METHOXYAMPHETAMINE	MAOA	2.29936850207029	-4.66107961090304	inhibitor	hsa00982 Drug metabolism - cytochrome P450
METHAMPHETAMINE	MAOA	2.29936850207029	-4.66107961090304	inhibitor	hsa00982 Drug metabolism - cytochrome P450
PARGYLINE	MAOA	2.29936850207029	-4.66107961090304	inhibitor	hsa00982 Drug metabolism - cytochrome P450
ZIMELIDINE	MAOA	2.29936850207029	-4.66107961090304	inhibitor	hsa00982 Drug metabolism - cytochrome P450
DISULFIRAM	ALDH2	2.29379470574497	-2.36388524499781	inhibitor	hsa00053 Ascorbate and aldarate metabolism
DISULFIRAM	ALDH2	2.29379470574497	-2.36388524499781	inhibitor	hsa00053 Ascorbate and aldarate metabolism
AMINOLEVULINIC ACID	ALAD	2.26549615108993	-1.33248721502179	inhibitor	hsa00860 Porphyrin and chlorophyll metabolism
PYRIDOXAL PHOSPHATE	SHMT2	2.25931608155042	1.56212900873196	cofactor	hsa00670 One carbon pool by folate
TETRAHYDROFOLIC ACID	SHMT2	2.25931608155042	1.56212900873196	cofactor	hsa00670 One carbon pool by folate
ISOVANILLIN	AOX1	2.24844294963703	-3.12265763755552	inhibitor	hsa00830 Retinol metabolism
MENADIONE	AOX1	2.24844294963703	-3.12265763755552	inhibitor	hsa00830 Retinol metabolism
DISULFIRAM	ALDH2	2.23840747081181	-2.36388524499781	inhibitor	hsa00280 Valine, leucine and isoleucine degradation
DISULFIRAM	ALDH2	2.23840747081181	-2.36388524499781	inhibitor	hsa00280 Valine, leucine and isoleucine degradation
ISOVANILLIN	AOX1	2.23840747081181	-3.12265763755552	inhibitor	hsa00280 Valine, leucine and isoleucine degradation
MENADIONE	AOX1	2.23840747081181	-3.12265763755552	inhibitor	hsa00280 Valine, leucine and isoleucine degradation
DISULFIRAM	ALDH2	2.21995208917274	-2.36388524499781	inhibitor	hsa00330 Arginine and proline metabolism
DISULFIRAM	ALDH2	2.21995208917274	-2.36388524499781	inhibitor	hsa00330 Arginine and proline metabolism
PHENTERMINE	MAOA	2.21995208917274	-4.66107961090304	antagonist	hsa00330 Arginine and proline metabolism
TRANYLCYPROMINE	MAOA	2.21995208917274	-4.66107961090304	inhibitor	hsa00330 Arginine and proline metabolism
PHENELZINE	MAOA	2.21995208917274	-4.66107961090304	antagonist	hsa00330 Arginine and proline metabolism
MINAPRINE	MAOA	2.21995208917274	-4.66107961090304	inhibitor	hsa00330 Arginine and proline metabolism
ZONISAMIDE	MAOA	2.21995208917274	-4.66107961090304	inhibitor	hsa00330 Arginine and proline metabolism
SELEGILINE	MAOA	2.21995208917274	-4.66107961090304	inhibitor	hsa00330 Arginine and proline metabolism
MOCLOBEMIDE	MAOA	2.21995208917274	-4.66107961090304	inhibitor	hsa00330 Arginine and proline metabolism
ISOCARBOXAZID	MAOA	2.21995208917274	-4.66107961090304	inhibitor	hsa00330 Arginine and proline metabolism
MMDA	MAOA	2.21995208917274	-4.66107961090304	inhibitor	hsa00330 Arginine and proline metabolism
4-METHOXYAMPHETAMINE	MAOA	2.21995208917274	-4.66107961090304	inhibitor	hsa00330 Arginine and proline metabolism
METHAMPHETAMINE	MAOA	2.21995208917274	-4.66107961090304	inhibitor	hsa00330 Arginine and proline metabolism
PARGYLINE	MAOA	2.21995208917274	-4.66107961090304	inhibitor	hsa00330 Arginine and proline metabolism
ZIMELIDINE	MAOA	2.21995208917274	-4.66107961090304	inhibitor	hsa00330 Arginine and proline metabolism
DISULFIRAM	ALDH2	2.21405858860647	-2.36388524499781	inhibitor	hsa00380 Tryptophan metabolism
DISULFIRAM	ALDH2	2.21405858860647	-2.36388524499781	inhibitor	hsa00380 Tryptophan metabolism
ISOVANILLIN	AOX1	2.21405858860647	-3.12265763755552	inhibitor	hsa00380 Tryptophan metabolism
MENADIONE	AOX1	2.21405858860647	-3.12265763755552	inhibitor	hsa00380 Tryptophan metabolism
PHENTERMINE	MAOA	2.21405858860647	-4.66107961090304	antagonist	hsa00380 Tryptophan metabolism
TRANYLCYPROMINE	MAOA	2.21405858860647	-4.66107961090304	inhibitor	hsa00380 Tryptophan metabolism
PHENELZINE	MAOA	2.21405858860647	-4.66107961090304	antagonist	hsa00380 Tryptophan metabolism
MINAPRINE	MAOA	2.21405858860647	-4.66107961090304	inhibitor	hsa00380 Tryptophan metabolism
ZONISAMIDE	MAOA	2.21405858860647	-4.66107961090304	inhibitor	hsa00380 Tryptophan metabolism
SELEGILINE	MAOA	2.21405858860647	-4.66107961090304	inhibitor	hsa00380 Tryptophan metabolism
MOCLOBEMIDE	MAOA	2.21405858860647	-4.66107961090304	inhibitor	hsa00380 Tryptophan metabolism
ISOCARBOXAZID	MAOA	2.21405858860647	-4.66107961090304	inhibitor	hsa00380 Tryptophan metabolism
MMDA	MAOA	2.21405858860647	-4.66107961090304	inhibitor	hsa00380 Tryptophan metabolism
4-METHOXYAMPHETAMINE	MAOA	2.21405858860647	-4.66107961090304	inhibitor	hsa00380 Tryptophan metabolism
METHAMPHETAMINE	MAOA	2.21405858860647	-4.66107961090304	inhibitor	hsa00380 Tryptophan metabolism
PARGYLINE	MAOA	2.21405858860647	-4.66107961090304	inhibitor	hsa00380 Tryptophan metabolism
ZIMELIDINE	MAOA	2.21405858860647	-4.66107961090304	inhibitor	hsa00380 Tryptophan metabolism
DISULFIRAM	ALDH2	2.16538618458162	-2.36388524499781	inhibitor	hsa00010 Glycolysis / Gluconeogenesis
DISULFIRAM	ALDH2	2.16538618458162	-2.36388524499781	inhibitor	hsa00010 Glycolysis / Gluconeogenesis
ISOVANILLIN	AOX1	2.16262359228444	-3.12265763755552	inhibitor	hsa00350 Tyrosine metabolism
MENADIONE	AOX1	2.16262359228444	-3.12265763755552	inhibitor	hsa00350 Tyrosine metabolism
PHENTERMINE	MAOA	2.16262359228444	-4.66107961090304	antagonist	hsa00350 Tyrosine metabolism
TRANYLCYPROMINE	MAOA	2.16262359228444	-4.66107961090304	inhibitor	hsa00350 Tyrosine metabolism
PHENELZINE	MAOA	2.16262359228444	-4.66107961090304	antagonist	hsa00350 Tyrosine metabolism
MINAPRINE	MAOA	2.16262359228444	-4.66107961090304	inhibitor	hsa00350 Tyrosine metabolism
ZONISAMIDE	MAOA	2.16262359228444	-4.66107961090304	inhibitor	hsa00350 Tyrosine metabolism
SELEGILINE	MAOA	2.16262359228444	-4.66107961090304	inhibitor	hsa00350 Tyrosine metabolism
MOCLOBEMIDE	MAOA	2.16262359228444	-4.66107961090304	inhibitor	hsa00350 Tyrosine metabolism
ISOCARBOXAZID	MAOA	2.16262359228444	-4.66107961090304	inhibitor	hsa00350 Tyrosine metabolism
MMDA	MAOA	2.16262359228444	-4.66107961090304	inhibitor	hsa00350 Tyrosine metabolism
4-METHOXYAMPHETAMINE	MAOA	2.16262359228444	-4.66107961090304	inhibitor	hsa00350 Tyrosine metabolism
METHAMPHETAMINE	MAOA	2.16262359228444	-4.66107961090304	inhibitor	hsa00350 Tyrosine metabolism
PARGYLINE	MAOA	2.16262359228444	-4.66107961090304	inhibitor	hsa00350 Tyrosine metabolism
ZIMELIDINE	MAOA	2.16262359228444	-4.66107961090304	inhibitor	hsa00350 Tyrosine metabolism
PHENELZINE	AOC3	2.16262359228444	-4.77809350246972	inhibitor	hsa00350 Tyrosine metabolism
HYDRALAZINE	AOC3	2.16262359228444	-4.77809350246972	inhibitor	hsa00350 Tyrosine metabolism
DISULFIRAM	ALDH2	2.15598887037138	-2.36388524499781	inhibitor	hsa00620 Pyruvate metabolism
DISULFIRAM	ALDH2	2.15598887037138	-2.36388524499781	inhibitor	hsa00620 Pyruvate metabolism
PYRIDOXAL PHOSPHATE	SHMT2	2.11668767265405	1.56212900873196	cofactor	hsa01230 Biosynthesis of amino acids
TETRAHYDROFOLIC ACID	SHMT2	2.11668767265405	1.56212900873196	cofactor	hsa01230 Biosynthesis of amino acids
PHENTERMINE	MAOA	2.11512441709043	-4.66107961090304	antagonist	hsa00360 Phenylalanine metabolism
TRANYLCYPROMINE	MAOA	2.11512441709043	-4.66107961090304	inhibitor	hsa00360 Phenylalanine metabolism
PHENELZINE	MAOA	2.11512441709043	-4.66107961090304	antagonist	hsa00360 Phenylalanine metabolism
MINAPRINE	MAOA	2.11512441709043	-4.66107961090304	inhibitor	hsa00360 Phenylalanine metabolism
ZONISAMIDE	MAOA	2.11512441709043	-4.66107961090304	inhibitor	hsa00360 Phenylalanine metabolism
SELEGILINE	MAOA	2.11512441709043	-4.66107961090304	inhibitor	hsa00360 Phenylalanine metabolism
MOCLOBEMIDE	MAOA	2.11512441709043	-4.66107961090304	inhibitor	hsa00360 Phenylalanine metabolism
ISOCARBOXAZID	MAOA	2.11512441709043	-4.66107961090304	inhibitor	hsa00360 Phenylalanine metabolism
MMDA	MAOA	2.11512441709043	-4.66107961090304	inhibitor	hsa00360 Phenylalanine metabolism
4-METHOXYAMPHETAMINE	MAOA	2.11512441709043	-4.66107961090304	inhibitor	hsa00360 Phenylalanine metabolism
METHAMPHETAMINE	MAOA	2.11512441709043	-4.66107961090304	inhibitor	hsa00360 Phenylalanine metabolism
PARGYLINE	MAOA	2.11512441709043	-4.66107961090304	inhibitor	hsa00360 Phenylalanine metabolism
ZIMELIDINE	MAOA	2.11512441709043	-4.66107961090304	inhibitor	hsa00360 Phenylalanine metabolism
PHENELZINE	AOC3	2.11512441709043	-4.77809350246972	inhibitor	hsa00360 Phenylalanine metabolism
HYDRALAZINE	AOC3	2.11512441709043	-4.77809350246972	inhibitor	hsa00360 Phenylalanine metabolism
PYRIDOXAL PHOSPHATE	SHMT2	2.04880033090358	1.56212900873196	cofactor	hsa01200 Carbon metabolism
TETRAHYDROFOLIC ACID	SHMT2	2.04880033090358	1.56212900873196	cofactor	hsa01200 Carbon metabolism
DISULFIRAM	ALDH2	2.01509641836248	-2.36388524499781	inhibitor	hsa00410 beta-Alanine metabolism
DISULFIRAM	ALDH2	2.01509641836248	-2.36388524499781	inhibitor	hsa00410 beta-Alanine metabolism
PHENELZINE	AOC3	2.01509641836248	-4.77809350246972	inhibitor	hsa00410 beta-Alanine metabolism
HYDRALAZINE	AOC3	2.01509641836248	-4.77809350246972	inhibitor	hsa00410 beta-Alanine metabolism
DISULFIRAM	ALDH2	2.00644868498127	-2.36388524499781	inhibitor	hsa00561 Glycerolipid metabolism
DISULFIRAM	ALDH2	2.00644868498127	-2.36388524499781	inhibitor	hsa00561 Glycerolipid metabolism
DISULFIRAM	ALDH2	1.94244718729354	-2.36388524499781	inhibitor	hsa00040 Pentose and glucuronate interconversions
DISULFIRAM	ALDH2	1.94244718729354	-2.36388524499781	inhibitor	hsa00040 Pentose and glucuronate interconversions
PHENTERMINE	MAOA	1.93526846594455	-4.66107961090304	antagonist	hsa00260 Glycine, serine and threonine metabolism
TRANYLCYPROMINE	MAOA	1.93526846594455	-4.66107961090304	inhibitor	hsa00260 Glycine, serine and threonine metabolism
PHENELZINE	MAOA	1.93526846594455	-4.66107961090304	antagonist	hsa00260 Glycine, serine and threonine metabolism
MINAPRINE	MAOA	1.93526846594455	-4.66107961090304	inhibitor	hsa00260 Glycine, serine and threonine metabolism
ZONISAMIDE	MAOA	1.93526846594455	-4.66107961090304	inhibitor	hsa00260 Glycine, serine and threonine metabolism
SELEGILINE	MAOA	1.93526846594455	-4.66107961090304	inhibitor	hsa00260 Glycine, serine and threonine metabolism
MOCLOBEMIDE	MAOA	1.93526846594455	-4.66107961090304	inhibitor	hsa00260 Glycine, serine and threonine metabolism
ISOCARBOXAZID	MAOA	1.93526846594455	-4.66107961090304	inhibitor	hsa00260 Glycine, serine and threonine metabolism
MMDA	MAOA	1.93526846594455	-4.66107961090304	inhibitor	hsa00260 Glycine, serine and threonine metabolism
4-METHOXYAMPHETAMINE	MAOA	1.93526846594455	-4.66107961090304	inhibitor	hsa00260 Glycine, serine and threonine metabolism
METHAMPHETAMINE	MAOA	1.93526846594455	-4.66107961090304	inhibitor	hsa00260 Glycine, serine and threonine metabolism
PARGYLINE	MAOA	1.93526846594455	-4.66107961090304	inhibitor	hsa00260 Glycine, serine and threonine metabolism
ZIMELIDINE	MAOA	1.93526846594455	-4.66107961090304	inhibitor	hsa00260 Glycine, serine and threonine metabolism
PYRIDOXAL PHOSPHATE	SHMT2	1.93526846594455	1.56212900873196	cofactor	hsa00260 Glycine, serine and threonine metabolism
TETRAHYDROFOLIC ACID	SHMT2	1.93526846594455	1.56212900873196	cofactor	hsa00260 Glycine, serine and threonine metabolism
PHENELZINE	AOC3	1.93526846594455	-4.77809350246972	inhibitor	hsa00260 Glycine, serine and threonine metabolism
HYDRALAZINE	AOC3	1.93526846594455	-4.77809350246972	inhibitor	hsa00260 Glycine, serine and threonine metabolism
ISOVANILLIN	AOX1	1.91133440601329	-3.12265763755552	inhibitor	hsa00760 Nicotinate and nicotinamide metabolism
MENADIONE	AOX1	1.91133440601329	-3.12265763755552	inhibitor	hsa00760 Nicotinate and nicotinamide metabolism
CLADRIBINE	PNP	1.91133440601329	1.62852682282495	inducer	hsa00760 Nicotinate and nicotinamide metabolism
DISULFIRAM	ALDH2	1.88739538414113	-2.36388524499781	inhibitor	hsa00071 Fatty acid degradation
DISULFIRAM	ALDH2	1.88739538414113	-2.36388524499781	inhibitor	hsa00071 Fatty acid degradation
PYRIDOXAL PHOSPHATE	SHMT2	1.66598010477408	1.56212900873196	cofactor	hsa00630 Glyoxylate and dicarboxylate metabolism
TETRAHYDROFOLIC ACID	SHMT2	1.66598010477408	1.56212900873196	cofactor	hsa00630 Glyoxylate and dicarboxylate metabolism
METHYCLOTHIAZIDE	CA4	1.46635478441785	-6.74584298315231	inhibitor	hsa00910 Nitrogen metabolism
ETHOXZOLAMIDE	CA4	1.46635478441785	-6.74584298315231	inhibitor	hsa00910 Nitrogen metabolism
BENDROFLUMETHIAZIDE	CA4	1.46635478441785	-6.74584298315231	inhibitor	hsa00910 Nitrogen metabolism
BENZTHIAZIDE	CA4	1.46635478441785	-6.74584298315231	inhibitor	hsa00910 Nitrogen metabolism
CYCLOTHIAZIDE	CA4	1.46635478441785	-6.74584298315231	inhibitor	hsa00910 Nitrogen metabolism
METHAZOLAMIDE	CA4	1.46635478441785	-6.74584298315231	inhibitor	hsa00910 Nitrogen metabolism
HYDROFLUMETHIAZIDE	CA4	1.46635478441785	-6.74584298315231	inhibitor	hsa00910 Nitrogen metabolism
ACETAZOLAMIDE	CA4	1.46635478441785	-6.74584298315231	inhibitor	hsa00910 Nitrogen metabolism
DORZOLAMIDE	CA4	1.46635478441785	-6.74584298315231	inhibitor	hsa00910 Nitrogen metabolism
CHLOROTHIAZIDE	CA4	1.46635478441785	-6.74584298315231	inhibitor	hsa00910 Nitrogen metabolism
ZONISAMIDE	CA4	1.46635478441785	-6.74584298315231	inhibitor	hsa00910 Nitrogen metabolism
HYDROCHLOROTHIAZIDE	CA4	1.46635478441785	-6.74584298315231	inhibitor	hsa00910 Nitrogen metabolism
TRICHLORMETHIAZIDE	CA4	1.46635478441785	-6.74584298315231	inhibitor	hsa00910 Nitrogen metabolism
BRINZOLAMIDE	CA4	1.46635478441785	-6.74584298315231	inhibitor	hsa00910 Nitrogen metabolism
ELLAGIC ACID	CA4	1.46635478441785	-6.74584298315231	inhibitor	hsa00910 Nitrogen metabolism
DICHLORPHENAMIDE	CA4	1.46635478441785	-6.74584298315231	inhibitor	hsa00910 Nitrogen metabolism
METHAZOLAMIDE	CA4	1.46635478441785	-6.74584298315231	inhibitor	hsa00910 Nitrogen metabolism
TOPIRAMATE	CA4	1.46635478441785	-6.74584298315231	inhibitor	hsa00910 Nitrogen metabolism
ACETAZOLAMIDE	CA4	1.46635478441785	-6.74584298315231	inhibitor	hsa00910 Nitrogen metabolism
ACETAZOLAMIDE SODIUM	CA4	1.46635478441785	-6.74584298315231	inhibitor	hsa00910 Nitrogen metabolism
